# Supplementary material for: Exploring Methods for Developing Local Climate Zones to Support Climate Research
Source: MDPI journal article supplement (doi:10.3390/cli10070109), 2022-07-16
Supplement: s1 [file s1]

## Supplemental materials

# A comparison of methods for developing local climate zones to support climate research

Sigler, L.; Gilabert, J.; Villalba, G.

| Built types             | Definition                                                                                                                                                                           | Land cover types                      | Definition                                                                                                                                                               |
|-------------------------|--------------------------------------------------------------------------------------------------------------------------------------------------------------------------------------|---------------------------------------|--------------------------------------------------------------------------------------------------------------------------------------------------------------------------|
| 1. Compact high-rise    | Dense mix of tall buildings to tens of stories. Few or no trees. Land cover mostly paved. Concrete, steel, stone, and glass construction materials.                                  | A. Dense trees                        | Heavily wooded landscape of deciduous and/or evergreen trees. Land cover mostly pervious (low plants). Zone function is natural forest, tree cultivation, or urban park. |
| 2. Compact midrise      | Dense mix of midrise buildings (3–9 stories). Few or no trees. Land cover mostly paved. Stone, brick, tile, and concrete construction materials.                                     | B. Scattered trees                    | Lightly wooded landscape of deciduous and/or evergreen trees. Land cover mostly pervious (low plants). Zone function is natural forest, tree cultivation, or urban park. |
| 3. Compact low-rise     | Dense mix of low-rise buildings (1–3 stories). Few or no trees. Land cover mostly paved. Stone, brick, tile, and concrete construction materials.                                    | C. Bush, scrub                        | Open arrangement of bushes, shrubs, and short, woody trees. Land cover mostly pervious (bare soil or sand). Zone function is natural scrubland or agriculture.           |
| 4. Open high-rise       | Open arrangement of tall buildings to tens of stories. Abundance of pervious land cover (low plants, scattered trees). Concrete, steel, stone, and glass construction materials.     | D. Low plants                         | Featureless landscape of grass or herbaceous plants/crops. Few or no trees. Zone function is natural grassland, agriculture, or urban park.                              |
| 5. Open midrise         | Open arrangement of midrise buildings (3–9 stories). Abundance of pervious land cover (low plants, scattered trees). Concrete, steel, stone, and glass construction materials.       | E. Bare rock or paved                 | Featureless landscape of rock or paved cover. Few or no trees or plants. Zone function is natural desert (rock) or urban transportation.                                 |
| 6. Open low-rise        | Open arrangement of low-rise buildings (1–3 stories). Abundance of pervious land cover (low plants, scattered trees). Wood, brick, stone, tile, and concrete construction materials. | F. Bare soil or sand                  | Featureless landscape of soil or sand cover. Few or no trees or plants. Zone function is natural desert or agriculture.                                                  |
| 7. Lightweight low-rise | Dense mix of single-story buildings. Few or no trees. Land cover mostly hard-packed. Lightweight construction materials (e.g., wood, thatch, corrugated metal).                      | G. Water                              | Large, open water bodies such as seas and lakes, or small bodies such as rivers, reservoirs, and lagoons.                                                                |
| 8. Large low-rise       | Open arrangement of large low-rise buildings (1–3 stories). Few or no trees. Land cover mostly paved. Steel, concrete, metal, and stone construction materials.                      | <b>VARIABLE LAND COVER PROPERTIES</b> |                                                                                                                                                                          |
| 9. Sparsely built       | Sparse arrangement of small or medium-sized buildings in a natural setting. Abundance of pervious land cover (low plants, scattered trees).                                          | b. bare trees                         | Leafless deciduous trees (e.g., winter). Increased sky view factor. Reduced albedo.                                                                                      |
| 10. Heavy industry      | Low-rise and midrise industrial structures (towers, tanks, stacks). Few or no trees. Land cover mostly paved or hard-packed. Metal, steel, and concrete construction materials.      | s. snow cover                         | Snow cover: >10 cm in depth. Low admittance. High albedo.                                                                                                                |
|                         |                                                                                                                                                                                      | d. dry ground                         | Parched soil. Low admittance. Large Bowen ratio. Increased albedo.                                                                                                       |
|                         |                                                                                                                                                                                      | w. wet ground                         | Waterlogged soil. High admittance. Small Bowen ratio. Reduced albedo.                                                                                                    |

Figure S1, Description of LCZ types.

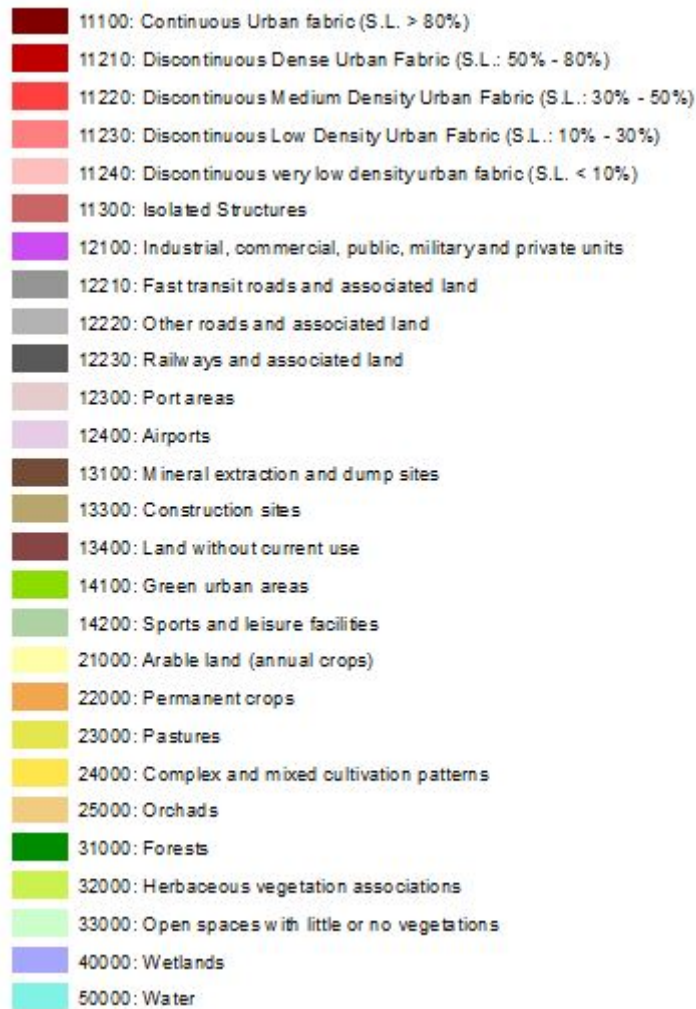

Figure S2, Urban Atlas land use classes

Table S3, Urban Atlas (UA)/Local Climate Zone (LCZ) reclassification matrix

| Urban Atlas Type                                           | LCZ Type           | UA<br>Code | LCZ<br>Code |
|------------------------------------------------------------|--------------------|------------|-------------|
| Continuous urban fabric                                    | Compact            | 11100      | 1, 2 or 3   |
| Discontinuous dense urban fabric                           | Open               | 11210      | 4, 5 or 6   |
| Discontinuous medium density urban fabric                  | Open               | 11220      | 5 or 6      |
| Discontinuous low-density urban fabric                     | Open               | 11230      | 6           |
| Discontinuous very low-density urban fabric                | Open               | 11240      | 6           |
| Isolated structures                                        | Sparsely built     | 11300      | 9           |
| Industrial, commercial, public, military and private units | --                 | 12100      | 1-6         |
| Fast transit roads and associated land                     | Bare rock or paved | 12210      | E (105)     |
| Other roads and associated land                            |                    | 12220      | E           |
| Railways and associated land                               |                    | 12230      | E           |
| Port areas                                                 |                    | 12300      | E           |
| Airports                                                   |                    | 12400      | E           |

|                                          |                               |       |         |
|------------------------------------------|-------------------------------|-------|---------|
| Mineral extraction and dump sites        |                               | 13100 | E       |
| Construction sites                       | Not calculated                | 13300 | E       |
| Land without current use                 | Not calculated                | 13400 | F       |
| Green urban areas                        | Scattered trees or low plants | 14100 | B or D  |
| Sports and leisure facilities            | Low plants                    | 14200 | D       |
| Arable land (annual crops)               | Low plants                    | 21000 | D       |
| Permanent crops                          | Low plants                    | 22000 | D       |
| Pastures                                 | Low plants                    | 23000 | D       |
| Complex and mixed cultivation patterns   | Low plants                    | 24000 | D       |
| Orchards at the fringe of urban classes  | Scattered trees               | 25000 | B       |
| Forest                                   | Dense trees                   | 31000 | A (101) |
| Herbaceous vegetation associations       | Scattered trees               | 32000 | B (102) |
| Open spaces with little or no vegetation | Bush, scrub                   | 33000 | C (103) |
| Wetlands                                 | Scattered trees or low plants | 40000 | B or D  |
| Water                                    | Water                         | 50000 | G (107) |
| No data (cloud/shadow)                   |                               | 91000 |         |
| No data (no image)                       |                               | 92000 |         |

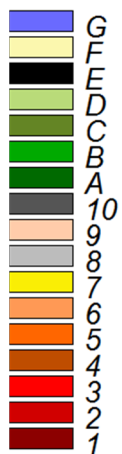

Figure S4, WUDAPT Local Climate Zone (LCZ) color palette and legend

Table S5, WUDAPT validation results – contingency matrix

| LCZ class | 1     | 2     | 3     | 5     | 6     | 8     | A     | B     | D     | E     | F     | G     | TB   | K       |
|-----------|-------|-------|-------|-------|-------|-------|-------|-------|-------|-------|-------|-------|------|---------|
| 1         | 14    |       |       |       |       |       |       |       |       |       |       |       | 14   | 1,000   |
| 2         |       | 130   | 2     |       |       | 1     |       |       |       |       |       |       | 133  | 0,977   |
| 3         |       |       | 25    | 3     |       |       |       |       |       |       |       |       | 28   | 0,893   |
| 5         |       |       |       | 52    |       |       |       |       |       |       |       |       | 52   | 1,000   |
| 6         |       |       |       |       | 164   |       |       |       |       |       |       | 6     | 170  | 0,965   |
| 8         |       |       |       |       |       | 165   |       |       |       |       |       |       | 165  | 1,000   |
| A         |       |       |       |       |       |       | 157   |       |       |       |       |       | 157  | 1,000   |
| B         |       |       |       |       |       |       |       | 93    | 19    |       |       |       | 112  | 0,830   |
| D         |       |       |       |       |       |       |       |       | 165   |       |       |       | 165  | 1,000   |
| E         |       |       |       |       |       |       |       |       |       | 95    |       |       | 95   | 1,000   |
| F         |       |       |       |       |       |       |       |       |       |       | 35    |       | 35   | 1,000   |
| G         |       |       |       |       |       |       |       |       |       |       |       | 952   | 952  | 1,000   |
| TA        | 14    | 130   | 27    | 55    | 164   | 166   | 157   | 93    | 184   | 95    | 35    | 958   | 2078 | 0,46102 |
| Omission  | 0,000 | 0,000 | 0,074 | 0,055 | 0,000 | 0,006 | 0,000 | 0,000 | 0,103 | 0,000 | 0,000 | 0,006 |      |         |

Table S6, WUDAPT test validation results – contingency matrix

| LCZ class | 1        | 2     | 3     | 5     | 6     | 8     | A     | B     | D     | E     | F     | G     | TB  | K     |
|-----------|----------|-------|-------|-------|-------|-------|-------|-------|-------|-------|-------|-------|-----|-------|
| 1         | 5        |       |       |       |       | 1     |       |       |       |       |       |       | 6   | 0,833 |
| 2         | 1        | 20    |       | 1     |       | 4     |       |       |       | 8     |       |       | 34  | 0,588 |
| 3         |          |       | 4     | 2     |       |       |       |       |       |       |       |       | 6   | 0,667 |
| 5         |          |       |       | 10    | 8     |       |       |       |       |       |       |       | 18  | 0,556 |
| 6         |          | 2     |       | 23    | 46    |       | 2     | 1     | 4     |       |       |       | 78  | 0,590 |
| 8         |          | 3     |       | 1     |       | 32    |       |       |       | 11    |       |       | 47  | 0,681 |
| A         |          |       |       | 2     |       |       | 98    | 1     |       |       | 3     |       | 104 | 0,942 |
| B         |          |       |       |       | 3     |       | 1     | 13    | 5     | 2     | 2     |       | 26  | 0,500 |
| D         |          |       |       |       |       |       | 3     | 4     | 27    |       | 13    |       | 47  | 0,574 |
| E         |          | 1     |       |       |       | 8     |       |       |       | 17    | 1     |       | 27  | 0,630 |
| F         |          |       |       | 2     |       |       |       |       |       |       | 8     |       | 10  | 0,800 |
| G         |          |       |       |       |       |       |       |       |       |       |       | 397   | 397 | 1,000 |
| TA        | 6        | 26    | 4     | 41    | 57    | 45    | 104   | 19    | 36    | 38    | 27    | 397   | 800 | 0,496 |
| Omission  | 0,833333 | 0,769 | 0,000 | 0,561 | 0,807 | 0,711 | 0,942 | 0,684 | 0,750 | 0,447 | 0,481 | 1,000 |     |       |

Table S7 Google Earth Engine (GEE) method validation results – contingency matrix - %

[illegible]

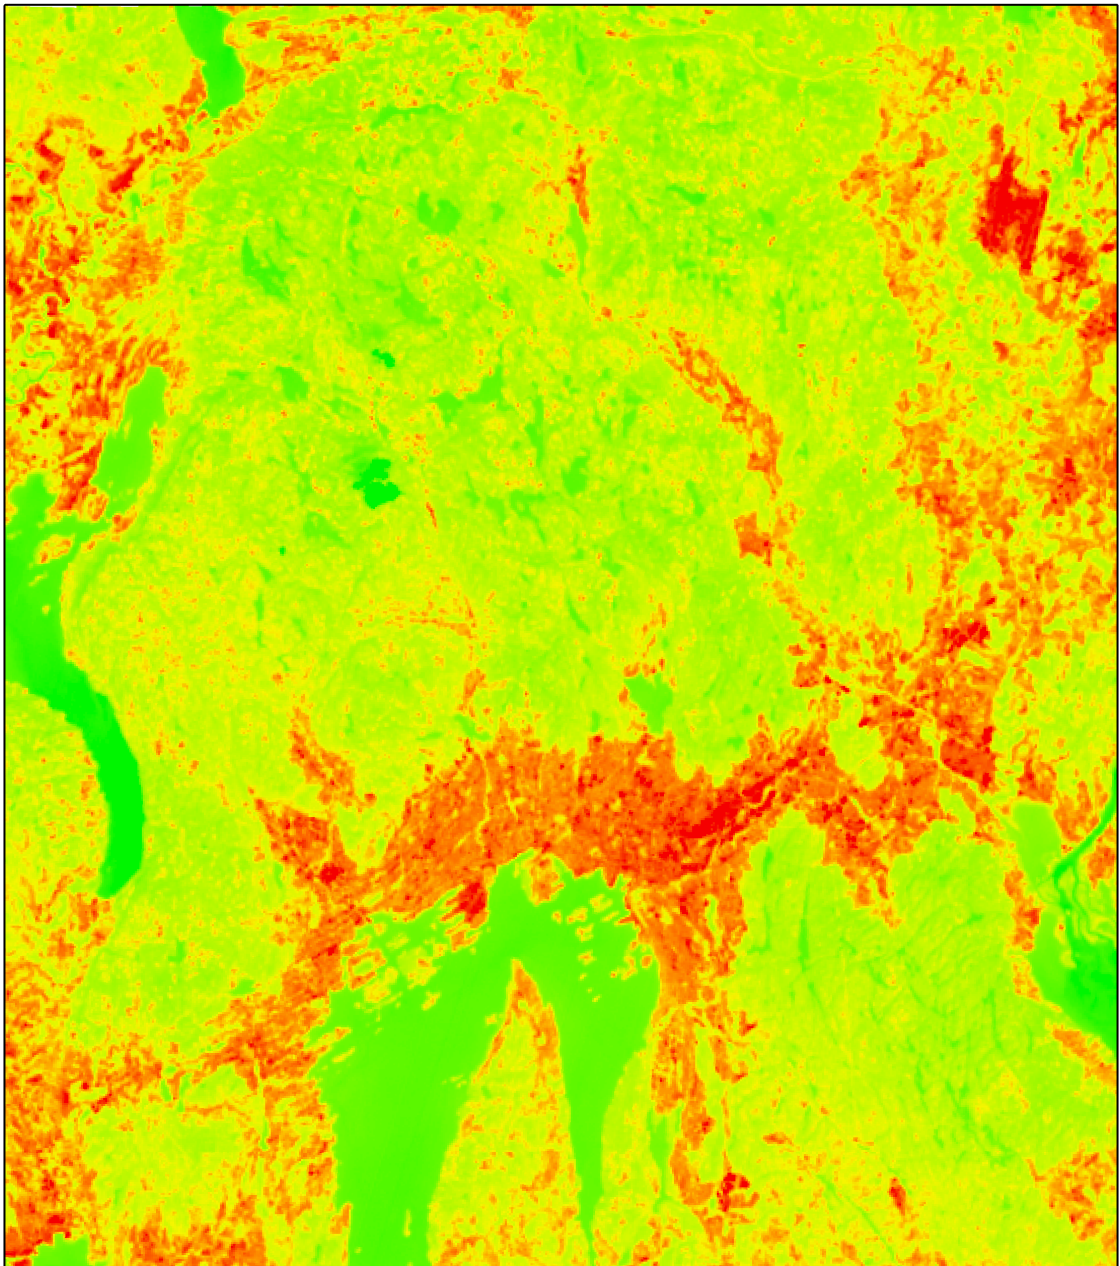

**TIRS Landsat 8 Oslo 30/7/2018**

**Temperature variation C**

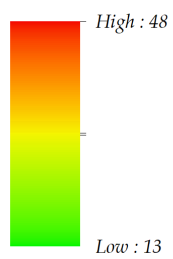

*Figure S8. Landsat 8 TIRS image (colorscale applied), 30/7/2018 - Oslo area*

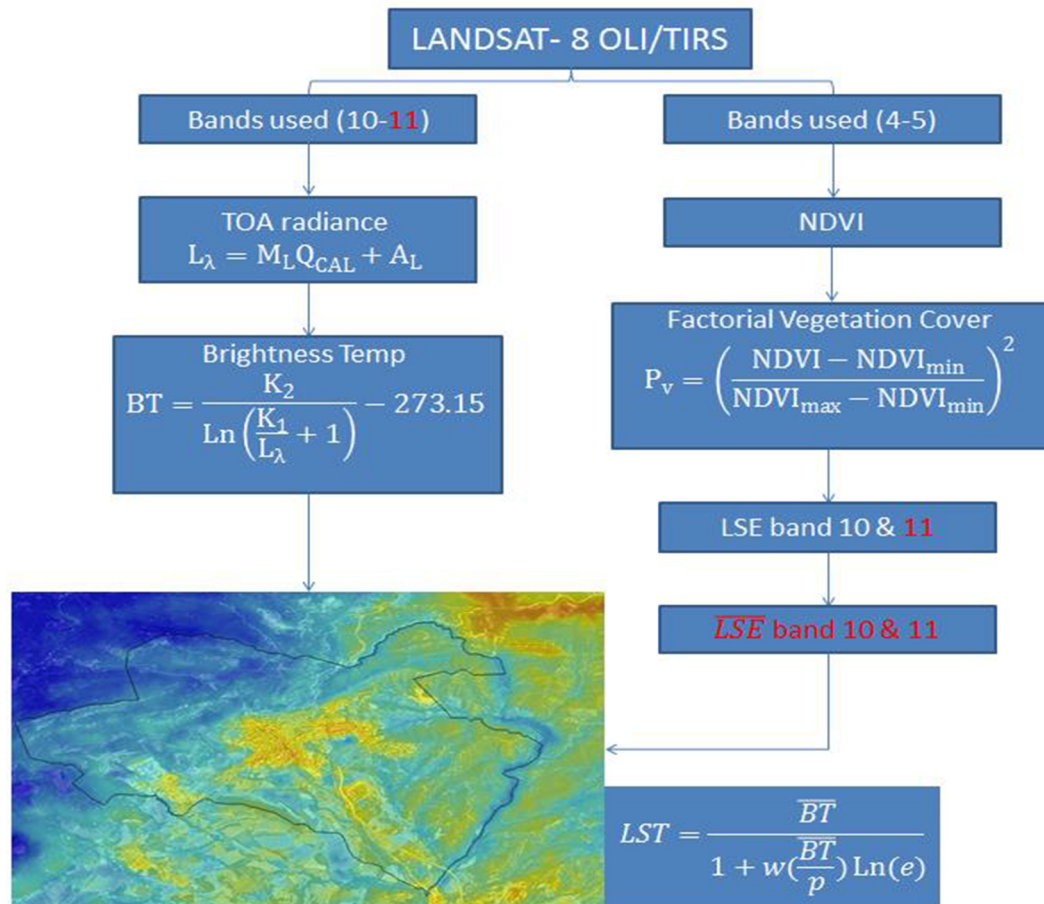

Figure S9. USGS LST raster generation workflow



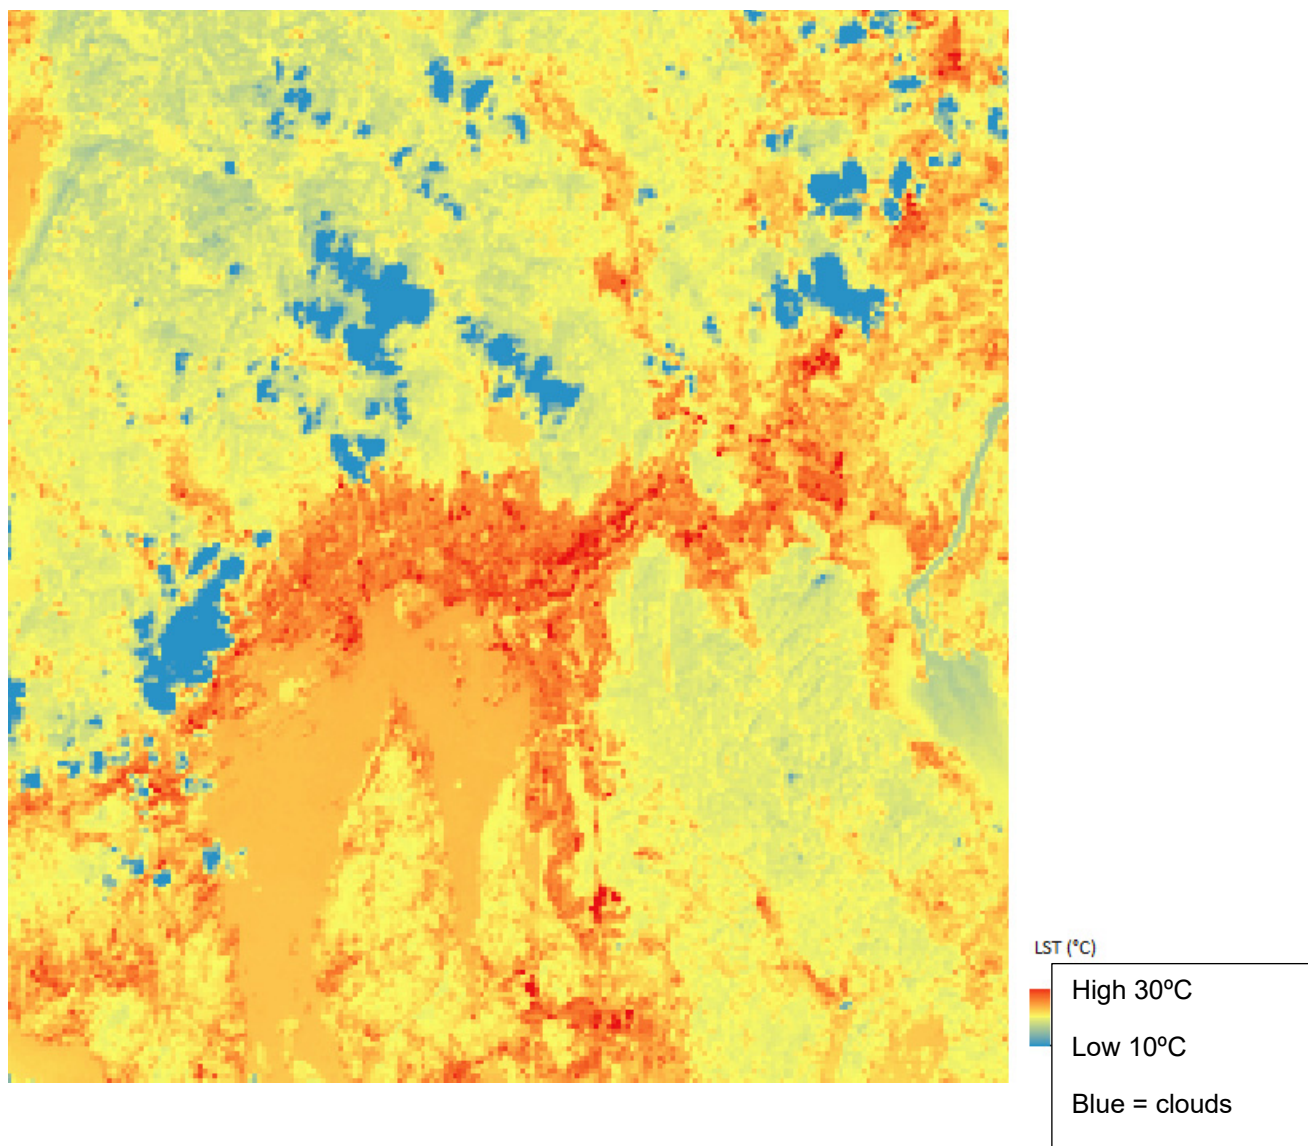

Figure S10. Landsat 8 TIRS image (colorscale applied), 25-08-2020- Oslo area



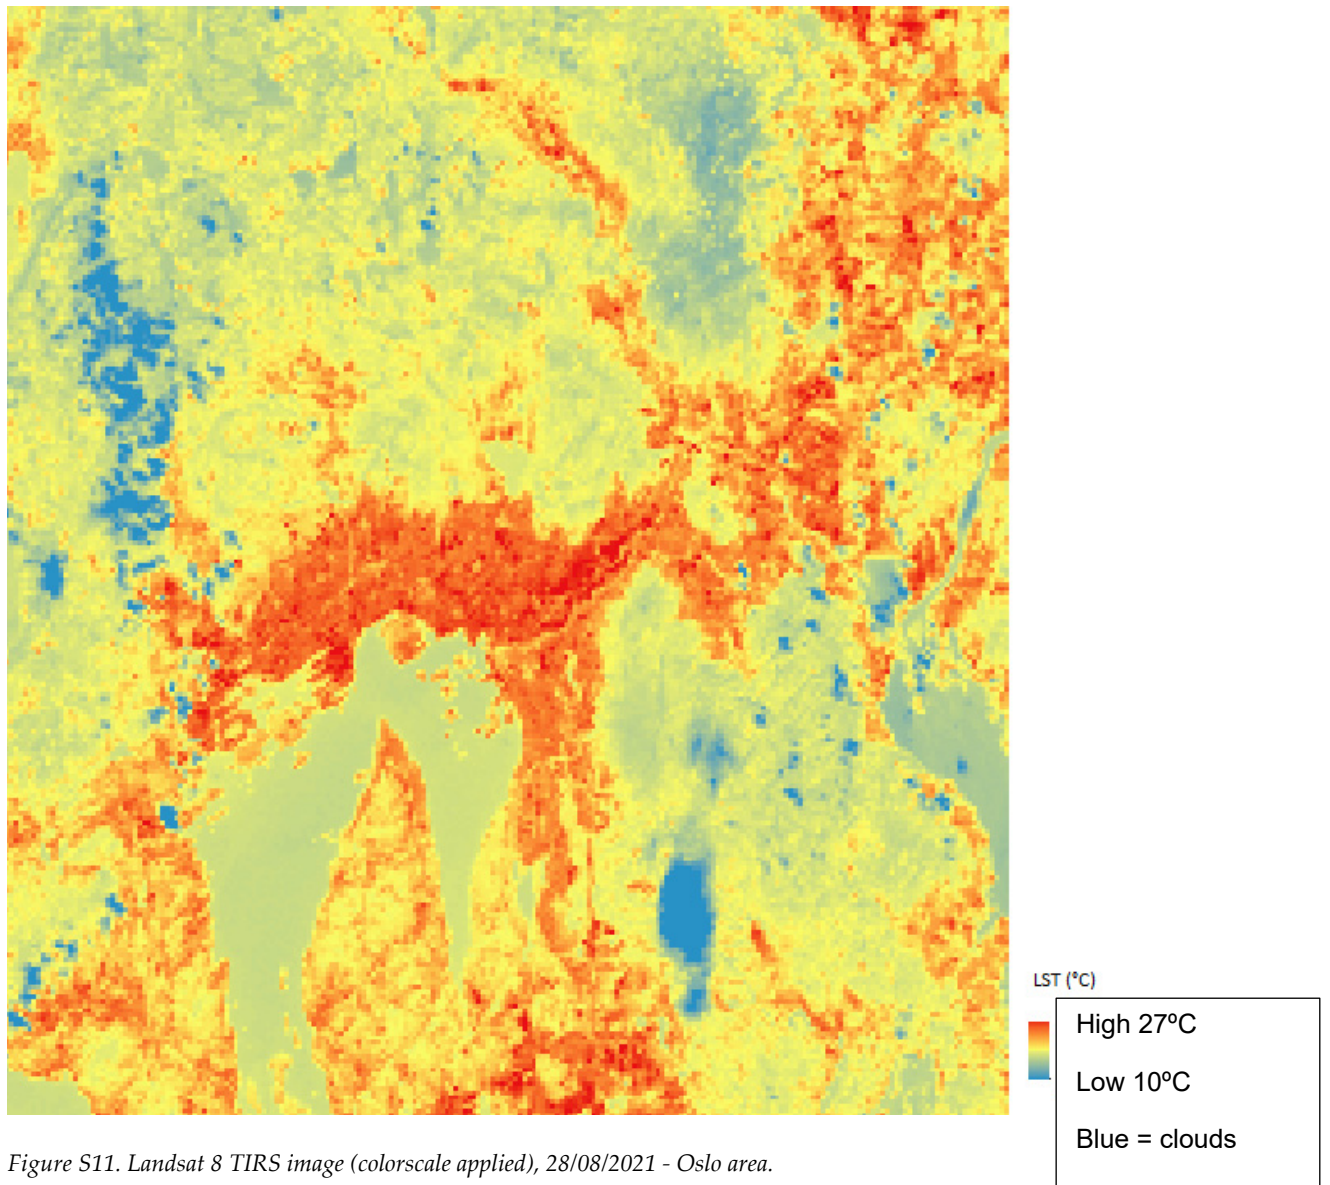

Figure S11. Landsat 8 TIRS image (colorscale applied), 28/08/2021 - Oslo area.

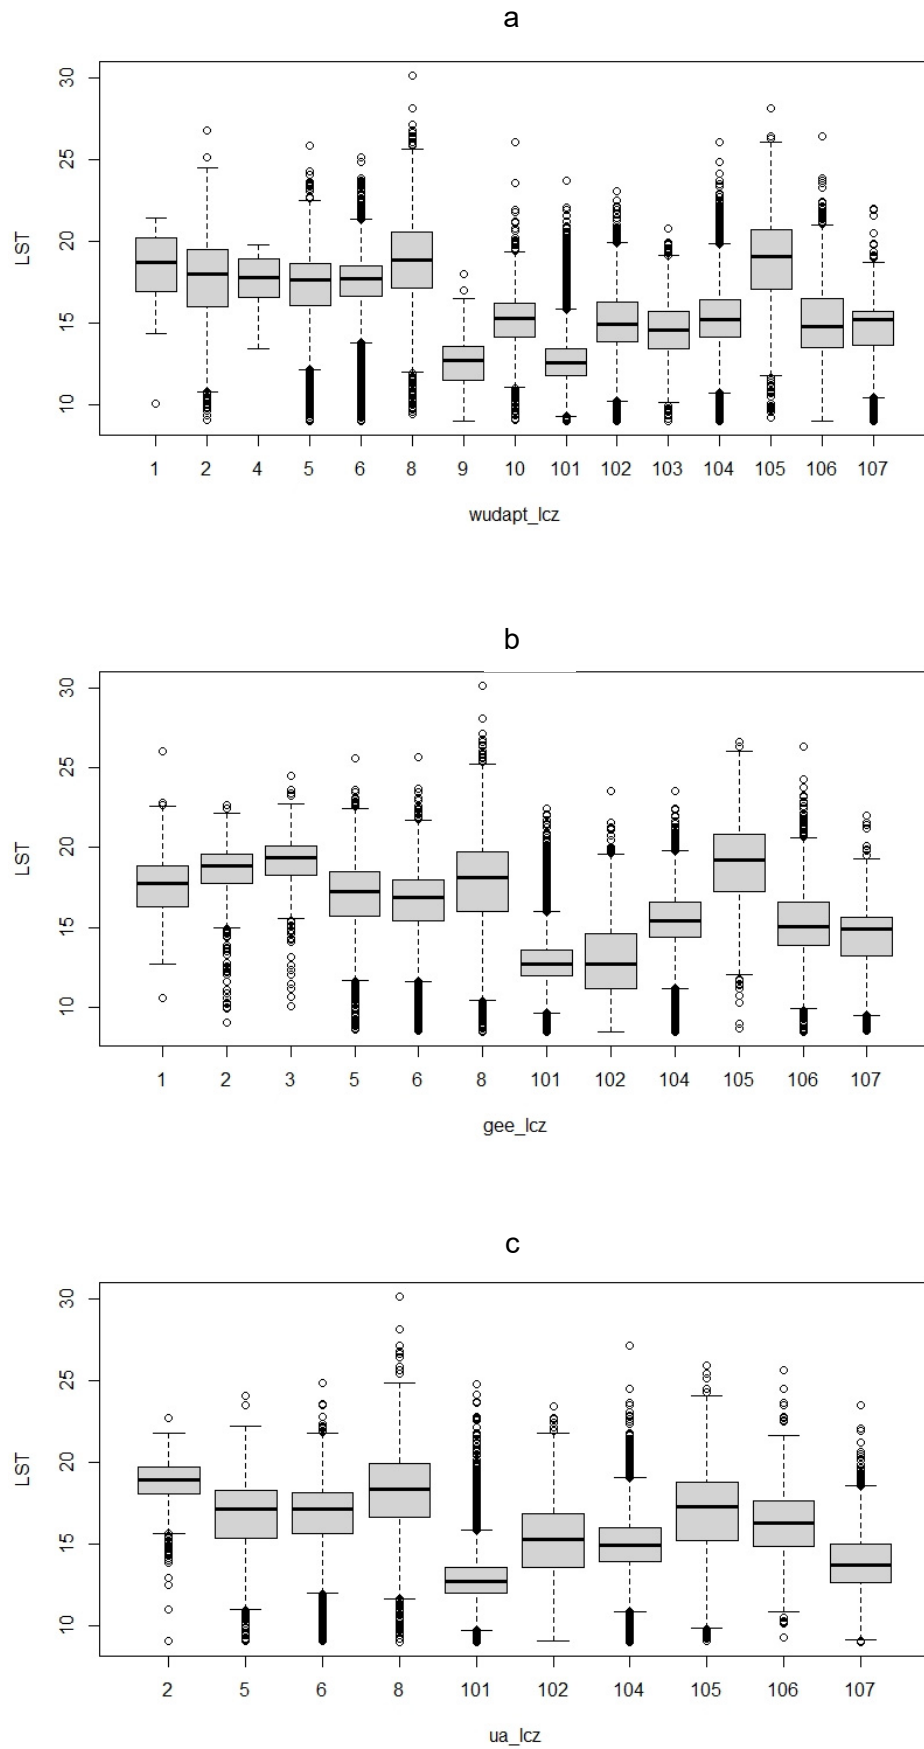

Figure S12 a/b/c. LCZ temperature distribution for 25th August 2020, WUDAPT method (a), GEE method (b), UA method (c).

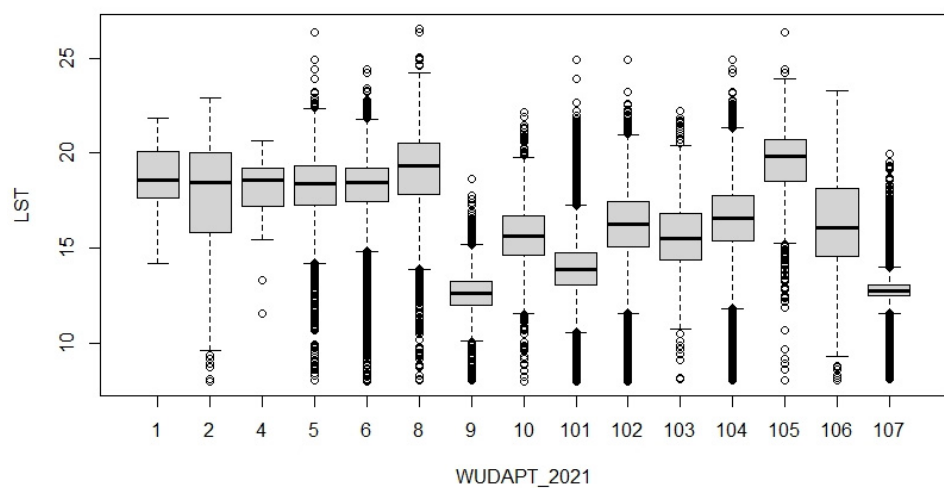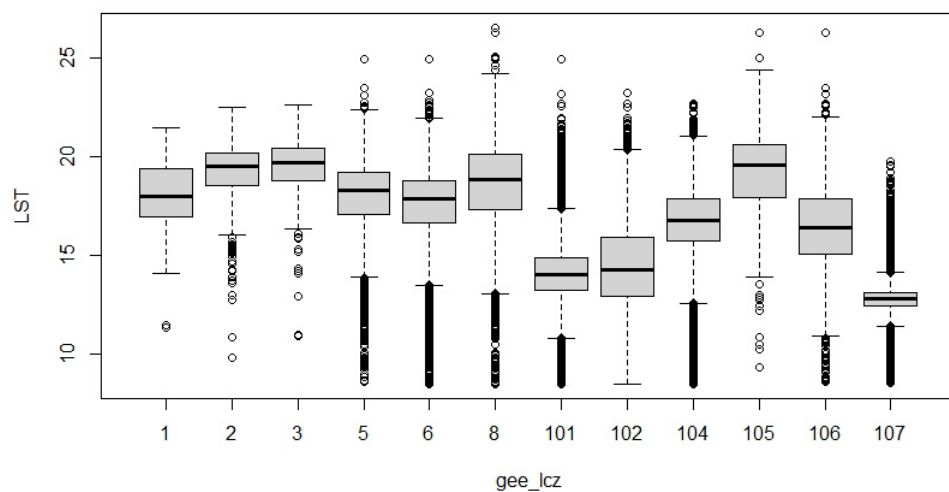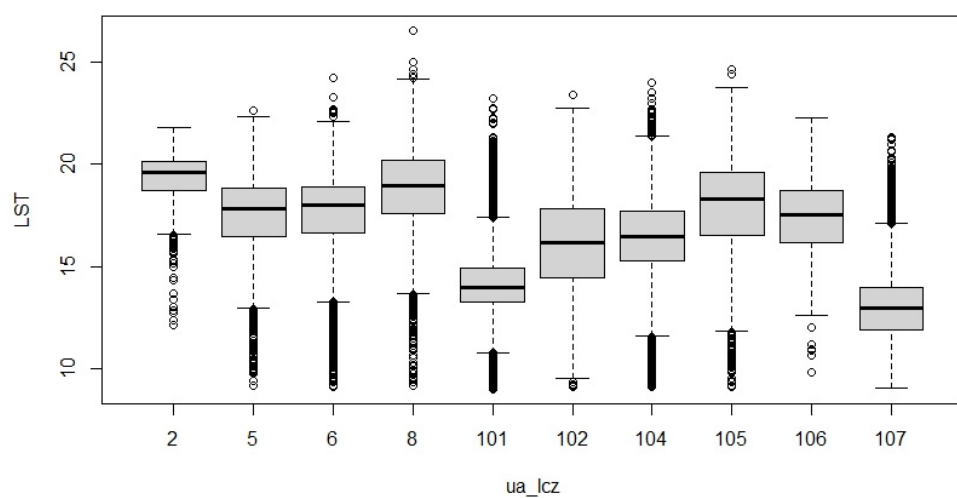

Figure S13 a/b/c. LCZ temperature distribution for 28th August 2021, WUDAPT method (a), GEE method (b), UA method (c).

Table S14. A summary of the differences amongst the three methods to generate LCZ.

|                                                    | WUDAPT                                                                                                                                | GEE                                                                                                               | GIS/UA                                                                                                       |
|----------------------------------------------------|---------------------------------------------------------------------------------------------------------------------------------------|-------------------------------------------------------------------------------------------------------------------|--------------------------------------------------------------------------------------------------------------|
| <b>Relative ease of creation of LCZs by method</b> | Requires knowledge of image processing, machine learning, and GIS geoprocessing                                                       | Requires knowledge of GEE and machine learning, albeit contained in online software suite                         | Requires basic knowledge of scripting and GIS client operation                                               |
| <b>Accuracy of results</b>                         | High: Kappa > .98                                                                                                                     | High: Kappa > .97                                                                                                 | Variable: dependent on source vector data                                                                    |
| <b>Specialized software required to be owned</b>   | Yes: Google Earth, SAGA, USGS Explorer,                                                                                               | No                                                                                                                | Yes: a GIS client                                                                                            |
| <b>Target audience</b>                             | GIS professionals, climatologists, engineers, academics                                                                               | GIS professionals, climatologists, engineers, academics, public government staff                                  | Any                                                                                                          |
| <b>Resolution</b>                                  | 100m2 (Landsat 8)                                                                                                                     | 100m2 (Landsat 8)                                                                                                 | Any                                                                                                          |
| <b>Discrepancies</b>                               | LCZ zones 1-3, A-B, 8-E                                                                                                               | LCZ zones 1-3, A-B, 8-E                                                                                           | Any: land uses can encompass any LCZ                                                                         |
| <b>Pros</b>                                        | Highly accurate and machine learning can be retrained and adjusted for optimal results. Uses maximum satellite bandwidth.             | Highly accurate, can be performed all online in one place. Follows the same ML based workflow as WUDAPT.          | Easy to learn and use, can generate LCZs extremely quickly. Can be higher resolution than satellite imagery. |
| <b>Cons</b>                                        | Extremely lengthy process, high learning curve until technique is mastered. Many moving parts and inputs. Requires specific software. | High learning curve, limited options compared to WUDAPT, dependent on one provider. Less 'tweakable' than WUDAPT. | Wholly dependent on quality and validation of source vector data. Tends to 'bunch' LCZs in categories.       |
